# Supplementary material for: Validating the relationships: which species of Myotis “nattereri” group (Chiroptera: Vespertilionidae) actually inhabits the Caucasus
Source: publisher site journal article supplement (doi:10.1515/mammalia-2019-0146), 2020-08-31
Supplement: Supplementary file 1 [file j_mammalia-2019-0146_suppl_002.docx]

**Supplementary Appendix 2:** Sequences, used in the study. Locality abbreviations as in Çoraman et al. (2019); * we use scientific names as was suggested by Ruedi et al. (2019).

| **GenBank assession number** | **Species** | **Specimen voucher number** | **Locality** |
| --- | --- | --- | --- |
| EU573078 | *Nyctalus plancyi* | BH90 |  |
| KF218497 | *Pipistrellus nathusii* | TR3 |  |
| MK183122 | *Myotis bechsteinii* | ZMB Mam 107059 | GR |
| MK183123 | *Myotis emarginatus* | ZMB Mam 107060 | AM |
| MK183124 | *Myotis crypticus** | ZMB Mam 107064 | SI |
| MK183125 | *Myotis crypticus* | ZMB Mam 107064 | IT |
| MK183126 | *Myotis crypticus* | ZMB Mam 107065 | AT |
| MK183127 | *Myotis crypticus* | ZMB Mam 107066 | SI |
| MK183128 | *Myotis crypticus* | ZMB Mam 107067 | SI |
| MK183129 | *Myotis crypticus* | ZMB Mam 107068 | SI |
| MK183130 | *Myotis crypticus* | ZMB Mam 107069 | SI |
| MK183131 | *Myotis crypticus* | ZMB Mam 107070 | SI |
| MK183132 | *Myotis crypticus* | ZMB Mam 107071 | SI |
| MK183133 | *Myotis crypticus* | ZMB Mam 107072 | SI |
| MK183134 | *Myotis crypticus* | ZMB Mam 107073 | SI |
| MK183135 | *Myotis crypticus* | ZMB Mam 107074 | SI |
| MK183136 | *Myotis crypticus* | ZMB Mam 107075 | SI |
| MK183137 | *Myotis crypticus* | ZMB Mam 107076 | SI |
| MK183138 | *Myotis crypticus* | ZMB Mam 107077 | SI |
| MK183139 | *Myotis crypticus* | ZMB Mam 107078 | SI |
| MK183140 | *Myotis crypticus* | ZMB Mam 107079 | SI |
| MK183141 | *Myotis crypticus* | ZMB Mam 107080 | SI |
| MK183142 | *Myotis crypticus* | ZMB Mam 107081 | SI |
| MK183143 | *Myotis crypticus* | ZMB Mam 107082 | SI |
| MK183144 | *Myotis crypticus* | ZMB Mam 107083 | SI |
| MK183145 | *Myotis crypticus* | ZMB Mam 107084 | SI |
| MK183146 | *Myotis crypticus* | ZMB Mam 107085 | SI |
| MK183147 | *Myotis crypticus* | ZMB Mam 107086 | SI |
| MK183148 | *Myotis crypticus* | ZMB Mam 107087 | SI |
| MK183149 | *Myotis crypticus* | ZMB Mam 107088 | SI |
| MK183150 | *Myotis crypticus* | ZMB Mam 107089 | SI |
| MK183151 | *Myotis crypticus* | ZMB Mam 107090 | SI |
| MK183152 | *Myotis crypticus* | ZMB Mam 107091 | SI |
| MK183153 | *Myotis crypticus* | ZMB Mam 107092 | SI |
| MK183154 | *Myotis crypticus* | ZMB Mam 107093 | SI |
| MK183155 | *Myotis crypticus* | ZMB Mam 107094 | SI |
| MK183156 | *Myotis crypticus* | ZMB Mam 107095 | SI |
| MK183157 | *Myotis crypticus* | ZMB Mam 107096 | SI |
| MK183158 | *Myotis crypticus* | ZMB Mam 107097 | SI |
| MK183159 | *Myotis crypticus* | ZMB Mam 107098 | SI |
| MK183160 | *Myotis crypticus* | ZMB Mam 107099 | SI |
| MK183161 | *Myotis crypticus* | ZMB Mam 107100 | SI |
| MK183162 | *Myotis crypticus* | ZMB Mam 107101 | SI |
| MK183163 | *Myotis crypticus* | ZMB Mam 107102 | SI |
| MK183164 | *Myotis crypticus* | ZMB Mam 107103 | SI |
| MK183165 | *Myotis crypticus* | ZMB Mam 107104 | SI |
| MK183166 | *Myotis crypticus* | ZMB Mam 107105 | SI |
| MK183167 | *Myotis crypticus* | ZMB Mam 107106 | SI |
| MK183168 | *Myotis crypticus* | ZMB Mam 107107 | SI |
| MK183169 | *Myotis crypticus* | ZMB Mam 107108 | SI |
| MK183170 | *Myotis crypticus* | ZMB Mam 107109 | SI |
| MK183171 | *Myotis crypticus* | ZMB Mam 107110 | HU |
| MK183172 | *Myotis nattereri* | ZMB Mam 107111 | HR |
| MK183173 | *Myotis nattereri* | ZMB Mam 107112 | HU |
| MK183174 | *Myotis nattereri* | ZMB Mam 107113 | GR |
| MK183175 | *Myotis nattereri* | ZMB Mam 107114 | GR |
| MK183176 | *Myotis nattereri* | ZMB Mam 107115 | IE |
| MK183177 | *Myotis nattereri* | ZMB Mam 107116 | GR |
| MK183178 | *Myotis nattereri* | ZMB Mam 107117 | TR |
| MK183179 | *Myotis nattereri* | ZMB Mam 107118 | DE |
| MK183180 | *Myotis nattereri* | ZMB Mam 107119 | GR |
| MK183181 | *Myotis nattereri* | ZMB Mam 107120 | TR |
| MK183182 | *Myotis nattereri* | ZMB Mam 107121 | GR |
| MK183183 | *Myotis nattereri* | ZMB Mam 107122 | GR |
| MK183184 | *Myotis nattereri* | ZMB Mam 107123 | GR |
| MK183185 | *Myotis nattereri* | ZMB Mam 107124 | GR |
| MK183186 | *Myotis nattereri* | ZMB Mam 107125 | GR |
| MK183187 | *Myotis nattereri* | ZMB Mam 107126 | DE |
| MK183188 | *Myotis nattereri* | ZMB Mam 107127 | DE |
| MK183189 | *Myotis nattereri* | ZMB Mam 107128 | DE |
| MK183190 | *Myotis nattereri* | ZMB Mam 107129 | DE |
| MK183191 | *Myotis nattereri* | ZMB Mam 107130 | DE |
| MK183192 | *Myotis nattereri* | ZMB Mam 107131 | HR |
| MK183193 | *Myotis nattereri* | ZMB Mam 107132 | DE |
| MK183194 | *Myotis nattereri* | ZMB Mam 107133 | DE |
| MK183195 | *Myotis nattereri* | ZMB Mam 107134 | DE |
| MK183196 | *Myotis nattereri* | ZMB Mam 107135 | DE |
| MK183197 | *Myotis nattereri* | ZMB Mam 107136 | ME |
| MK183198 | *Myotis nattereri* | ZMB Mam 107137 | ME |
| MK183199 | *Myotis nattereri* | ZMB Mam 107138 | SI |
| MK183200 | *Myotis nattereri* | ZMB Mam 107139 | ME |
| MK183201 | *Myotis nattereri* | ZMB Mam 107140 | ME |
| MK183202 | *Myotis nattereri* | ZMB Mam 107141 | TR |
| MK183203 | *Myotis nattereri* | ZMB Mam 107142 | HU |
| MK183204 | *Myotis nattereri* | ZMB Mam 107143 | RO |
| MK183205 | *Myotis nattereri* | ZMB Mam 107144 | UA |
| MK183206 | *Myotis nattereri* | ZMB Mam 107145 | UA |
| MK183207 | *Myotis nattereri* | ZMB Mam 107146 | UA |
| MK183208 | *Myotis nattereri* | ZMB Mam 107147 | PL |
| MK183209 | *Myotis nattereri* | ZMB Mam 107148 | DE |
| MK183210 | *Myotis nattereri* | ZMB Mam 107149 | DE |
| MK183211 | *Myotis nattereri* | ZMB Mam 107150 | DE |
| MK183212 | *Myotis nattereri* | ZMB Mam 107151 | DE |
| MK183213 | *Myotis nattereri* | ZMB Mam 107152 | DE |
| MK183214 | *Myotis nattereri* | ZMB Mam 107153 | DE |
| MK183215 | *Myotis nattereri* | ZMB Mam 107154 | DE |
| MK183216 | *Myotis nattereri* | ZMB Mam 107155 | DE |
| MK183217 | *Myotis nattereri* | ZMB Mam 107156 | DE |
| MK183218 | *Myotis nattereri* | ZMB Mam 107157 | DE |
| MK183219 | *Myotis nattereri* | ZMB Mam 107158 | DE |
| MK183220 | *Myotis nattereri* | ZMB Mam 107159 | TR |
| MK183221 | *Myotis hoveli 2* | ZMB Mam 107160 | TR |
| MK183222 | *Myotis hoveli 3* | ZMB Mam 107161 | IL |
| MK183223 | *Myotis hoveli 3* | ZMB Mam 107162 | IL |
| MK183224 | *Myotis hoveli 3* | ZMB Mam 107163 | IL |
| MK183225 | *Myotis hoveli 3* | ZMB Mam 107164 | IL |
| MK183226 | *Myotis hoveli 3* | ZMB Mam 107165 | IL |
| MK183227 | *Myotis hoveli 3* | ZMB Mam 107166 | IL |
| MK183228 | *Myotis hoveli 3* | ZMB Mam 107167 | IL |
| MK183229 | *Myotis hoveli 3* | ZMB Mam 107168 | IL |
| MK183230 | *Myotis hoveli 3* | ZMB Mam 107169 | IL |
| MK183231 | *Myotis hoveli 3* | ZMB Mam 107170 | IL |
| MK183232 | *Myotis hoveli 3* | ZMB Mam 107171 | IL |
| MK183233 | *Myotis hoveli 3* | ZMB Mam 107172 | IL |
| MK183234 | *Myotis hoveli 3* | ZMB Mam 107173 | IL |
| MK183235 | *Myotis hoveli 2* | ZMB Mam 107187 | TR |
| MK183236 | *Myotis hoveli 2* | ZMB Mam 107188 | TR |
| MK183237 | *Myotis hoveli 2* | ZMB Mam 107189 | TR |
| MK183238 | *Myotis hoveli 2* | ZMB Mam 107190 | TR |
| MK183239 | *Myotis hoveli 1* | ZMB Mam 107191 | TR |
| MK183240 | *Myotis hoveli 1* | ZMB Mam 107192 | TR |
| MK183241 | *Myotis hoveli 1* | ZMB Mam 107193 | TR |
| MK183242 | *Myotis hoveli 1* | ZMB Mam 107194 | TR |
| MK183243 | *Myotis hoveli 1* | ZMB Mam 107195 | TR |
| MK183244 | *Myotis hoveli 1* | ZMB Mam 107196 | TR |
| MK183245 | *Myotis tschuliensis* | ZMB Mam 107197 | UA |
| MK183246 | *Myotis tschuliensis* | ZMB Mam 107198 | UA |
| MK183247 | *Myotis tschuliensis* | ZMB Mam 107199 | AM |
| MK183248 | *Myotis tschuliensis* | ZMB Mam 107200 | AM |
| MK183249 | *Myotis tschuliensis* | ZMB Mam 107201 | AM |
| MK183250 | *Myotis tschuliensis* | ZMB Mam 107202 | GE |
| MK183251 | *Myotis tschuliensis* | ZMB Mam 107203 | GE |
| MK183252 | *Myotis schaubi* | ZMB Mam 107204 | AM |
| MK183253 | *Myotis schaubi* | ZMB Mam 107205 | AM |
| MK183254 | *Myotis schaubi* | ZMB Mam 107206 | AM |
| MK183255 | *Myotis schaubi* | ZMB Mam 107207 | AM |
| MK183256 | *Myotis schaubi* | ZMB Mam 107208 | AM |
| MK183257 | *Myotis schaubi* | ZMB Mam 107209 | AM |
| MK183258 | *Myotis schaubi* | ZMB Mam 107210 | AM |
| MK183259 | *Myotis schaubi* | ZMB Mam 107211 | AM |
| MK183260 | *Myotis schaubi* | ZMB Mam 107212 | AM |
| MK183261 | *Myotis schaubi* | ZMB Mam 107213 | AM |
| MK183262 | *Myotis schaubi* | ZMB Mam 107214 | AM |
| MK183263 | *Myotis schaubi* | ZMB Mam 107215 | AM |
| MK183264 | *Myotis schaubi* | ZMB Mam 107216 | AM |
| MK183265 | *Myotis schaubi* | ZMB Mam 107217 | AM |
| MK183266 | *Myotis schaubi* | ZMB Mam 107218 | AM |
| MK183267 | *Myotis schaubi* | ZMB Mam 107219 | AM |
| MK183268 | *Myotis schaubi* | ZMB Mam 107220 | AM |
| MK183269 | *Myotis schaubi* | ZMB Mam 107221 | AM |
| MK183270 | *Myotis schaubi* | ZMB Mam 107222 | AM |
| MK183271 | *Myotis schaubi* | ZMB Mam 107223 | AM |
| MK183272 | *Myotis schaubi* | ZMB Mam 107224 | AM |
| MK183273 | *Myotis schaubi* | ZMB Mam 107225 | AM |
| MK183274 | *Myotis schaubi* | ZMB Mam 107226 | AM |
| MK183275 | *Myotis schaubi* | ZMB Mam 107227 | AM |
| MK183276 | *Myotis schaubi* | ZMB Mam 107228 | AM |
| MK183277 | *Myotis zenatius** | ZMB Mam 107229 | MA |
| MK183278 | *Myotis zenatius* | ZMB Mam 107230 | MA |
| MK183279 | *Myotis zenatius* | ZMB Mam 107231 | MA |
| MK183280 | *Myotis escalerai escalerai* | ZMB Mam 107232 | ES |
| MK183281 | *Myotis escalerai escalerai* | ZMB Mam 107233 | ES |
| MK183282 | *Myotis escalerai escalerai* | ZMB Mam 107234 | ES |
| MN563130 | *Myotis tschuliensis* | ZMMU S-83992 | TU |
| MN563131 | *Myotis tschuliensis* | ZMMU S-93822 | TU |
